# Supplementary material for: Targeting ESR1 mutation–induced transcriptional addiction in breast cancer with BET inhibition
Source: JCI journal article supplement (doi:10.1172/jci.insight.151851), 2022-07-26
Supplement: sd1 [file 1]

You are being redirected.
